# Supplementary material
Source: publisher site journal article supplement (https://www.dovepress.com/article/615678)
Supplement: Supplementary file 1 [file Supplementary%20Materials.docx]

Supplementary Material

**Table S1 Patient’s blood test results before and after treatment**

|  | On admission | Day 14 | On discharge | Reference range |
| --- | --- | --- | --- | --- |
| General haematology |  |  |  |  |
| White cell count, ×10⁹/L | 19.4 | 13.3 | 4.39 | 3.5-9.5 |
| Neutrophil count, ×10⁹/L | 17.96 | 9.97 | 2.50 | 1.80-6.30 |
| Lymphocyte count, ×10⁹/L | 0.65 | 2.19 | 1.41 | 1.10-3.20 |
| Mean corpuscular volume, fL | 83.6 | 82.0 | 95.5 | 82.0-100.0 |
| Haemoglobin, g/L | 87 | 96 | 76 | 130-175 |
| Platelet count, ×10⁹/L | 176 | 201 | 129 | 125-350 |
| Coagulation |  |  |  |  |
| Activated partial thromboplastin time, S | 32.2 | 29.2 | 25.5 | 21.0-33.0 |
| Prothrombin time, S | 19.4 | 15.8 | 12.0 | 9.0-13.0 |
| Prothrombin time activity percentage, % | 43.60 | 58.20 | 89.40 | 80-120 |
| C-reactive protein, mg/L | 184.57 | 41.29 | 4.38 | 0.00-1.00 |

**Table S2 Results of mNGS in blood of patient**

|  | Gram stain | Genus name | Sequence number | Species name | Sequence number |
| --- | --- | --- | --- | --- | --- |
| Other hospital | G- | *Acinetbacter* | 1564 | *Acinetbacter baumannii* | 1472 |
| Day 11 | G- | *Acinetbacter* | 174 | *Acinetbacter baumannii* | 44 |
| Day 19 | G- | *Acinetbacter* | 133 | *Acinetbacter baumannii* | 5 |
